# Supplementary material
Source: PubMed Central journal article supplement (PMC8014537)
Supplement: ALL-76-1813-s002.pdf [file ALL-76-1813-s002.pdf]

**TABLE S3. Dataset including demographic and diseases features of the overall population, patients discontinuing and continuing treatment at different timepoints.**

|                 | Patients discontinuing treatment<br>N=251 |         | Patients continuing treatment<br>N=1580 |         | TOTAL<br>N=1831 |         |
|-----------------|-------------------------------------------|---------|-----------------------------------------|---------|-----------------|---------|
| <b>Gender</b>   |                                           |         |                                         |         |                 |         |
| n               | 251                                       |         | 1580                                    |         | 1831            |         |
| F               | 119                                       | (47.4%) | 713                                     | (45.1%) | 832             | (45.4%) |
| M               | 132                                       | (52.6%) | 867                                     | (54.9%) | 999             | (54.6%) |
| <b>Smoking</b>  |                                           |         |                                         |         |                 |         |
| n               | 251                                       |         | 1578                                    |         | 1829            |         |
| Former smoker   | 20                                        | (8.0%)  | 126                                     | (8.0%)  | 146             | (8.0%)  |
| NO              | 172                                       | (68.5%) | 1087                                    | (68.9%) | 1259            | (68.8%) |
| YES             | 59                                        | (23.5%) | 365                                     | (23.1%) | 424             | (23.2%) |
| <b>Asthma</b>   |                                           |         |                                         |         |                 |         |
| n               | 251                                       |         | 1579                                    |         | 1830            |         |
| NO              | 172                                       | (68.5%) | 1081                                    | (68.5%) | 1253            | (68.5%) |
| YES             | 79                                        | (31.5%) | 498                                     | (31.5%) | 577             | (31.5%) |
| <b>Rhinitis</b> |                                           |         |                                         |         |                 |         |
| n               | 251                                       |         | 1579                                    |         | 1830            |         |
| NO              | 133                                       | (53.0%) | 838                                     | (53.1%) | 971             | (53.1%) |

|                       | Patients discontinuing treatment<br>N=251 |         | Patients continuing treatment<br>N=1580 |         | TOTAL<br>N=1831 |         |
|-----------------------|-------------------------------------------|---------|-----------------------------------------|---------|-----------------|---------|
| <b>Rhinitis</b>       |                                           |         |                                         |         |                 |         |
| YES                   | 118                                       | (47.0%) | 741                                     | (46.9%) | 859             | (46.9%) |
| <b>Conjunctivitis</b> |                                           |         |                                         |         |                 |         |
| n                     | 250                                       |         | 1579                                    |         | 1829            |         |
| NO                    | 173                                       | (69.2%) | 1016                                    | (64.3%) | 1189            | (65.0%) |
| YES                   | 77                                        | (30.8%) | 563                                     | (35.7%) | 640             | (35.0%) |
| <b>Antihistamines</b> |                                           |         |                                         |         |                 |         |
| n                     | 251                                       |         | 1580                                    |         | 1831            |         |
| NO                    | 182                                       | (72.5%) | 1209                                    | (76.5%) | 1391            | (76.0%) |
| YES                   | 69                                        | (27.5%) | 371                                     | (23.5%) | 440             | (24.0%) |
| <b>Cyclosporine</b>   |                                           |         |                                         |         |                 |         |
| n                     | 251                                       |         | 1580                                    |         | 1831            |         |
| NO                    | 204                                       | (81.3%) | 1491                                    | (94.4%) | 1695            | (92.6%) |
| YES                   | 47                                        | (18.7%) | 89                                      | (5.6%)  | 136             | (7.4%)  |
| <b>Azathioprine</b>   |                                           |         |                                         |         |                 |         |
| n                     | 251                                       |         | 1580                                    |         | 1831            |         |

|                                 | Patients discontinuing treatment<br>N=251 |          | Patients continuing treatment<br>N=1580 |         | TOTAL<br>N=1831 |         |
|---------------------------------|-------------------------------------------|----------|-----------------------------------------|---------|-----------------|---------|
| <b>Azathioprine</b>             |                                           |          |                                         |         |                 |         |
| NO                              | 251                                       | (100.0%) | 1572                                    | (99.5%) | 1823            | (99.6%) |
| YES                             | 0                                         |          | 8                                       | (0.5%)  | 8               | (0.4%)  |
| <b>Methotrexate</b>             |                                           |          |                                         |         |                 |         |
| n                               | 251                                       |          | 1580                                    |         | 1831            |         |
| NO                              | 245                                       | (97.6%)  | 1549                                    | (98.0%) | 1794            | (98.0%) |
| YES                             | 6                                         | (2.4%)   | 31                                      | (2.0%)  | 37              | (2.0%)  |
| <b>Mycophenolate mofetil</b>    |                                           |          |                                         |         |                 |         |
| n                               | 251                                       |          | 1580                                    |         | 1831            |         |
| NO                              | 251                                       | (100.0%) | 1579                                    | (99.9%) | 1830            | (99.9%) |
| YES                             | 0                                         |          | 1                                       | (0.1%)  | 1               | (0.1%)  |
| <b>Systemic corticosteroids</b> |                                           |          |                                         |         |                 |         |
| n                               | 251                                       |          | 1580                                    |         | 1831            |         |
| NO                              | 228                                       | (90.8%)  | 1522                                    | (96.3%) | 1750            | (95.6%) |
| YES                             | 23                                        | (9.2%)   | 58                                      | (3.7%)  | 81              | (4.4%)  |

|                                                | Patients discontinuing treatment<br>N=251 |         | Patients continuing treatment<br>N=1580 |          | TOTAL<br>N=1831 |         |
|------------------------------------------------|-------------------------------------------|---------|-----------------------------------------|----------|-----------------|---------|
| <b>Phototherapy</b>                            |                                           |         |                                         |          |                 |         |
| n                                              | 251                                       |         | 1580                                    |          | 1831            |         |
| NO                                             | 191                                       | (76.1%) | 1560                                    | (98.7%)  | 1751            | (95.6%) |
| YES                                            | 60                                        | (23.9%) | 20                                      | (1.3%)   | 80              | (4.4%)  |
| <b>Dupilumab</b>                               |                                           |         |                                         |          |                 |         |
| n                                              | 248                                       |         | 1576                                    |          | 1824            |         |
| NO                                             | 115                                       | (46.4%) | 172                                     | (10.9%)  | 287             | (15.7%) |
| YES                                            | 133                                       | (53.6%) | 1404                                    | (89.1%)  | 1537            | (84.3%) |
| <b>Stopped therapy (any reason) at visit 1</b> |                                           |         |                                         |          |                 |         |
| n                                              | 251                                       |         | 1580                                    |          | 1831            |         |
| NO                                             | 59                                        | (23.5%) | 1580                                    | (100.0%) | 1639            | (89.5%) |
| YES                                            | 192                                       | (76.5%) | 0                                       |          | 192             | (10.5%) |
| <b>Stopped therapy (any reason) at visit 2</b> |                                           |         |                                         |          |                 |         |

|     |             |  |               |  |              |
|-----|-------------|--|---------------|--|--------------|
| n   | 236         |  | 1534          |  | 1770         |
| NO  | 173 (73.3%) |  | 1534 (100.0%) |  | 1707 (96.4%) |
| YES | 63 (26.7%)  |  | 0             |  | 63 (3.6%)    |

|                                         | Patients discontinuing<br>treatment<br>N=251 |  | Patients continuing<br>treatment<br>N=1580 |  | TOTAL<br>N=1831 |
|-----------------------------------------|----------------------------------------------|--|--------------------------------------------|--|-----------------|
| Stopped therapy (any reason) at visit 3 |                                              |  |                                            |  |                 |
| n                                       | 190                                          |  | 1434                                       |  | 1624            |
| NO                                      | 162 (85.3%)                                  |  | 1434 (100.0%)                              |  | 1596 (98.3%)    |
| YES                                     | 28 (14.7%)                                   |  | 0                                          |  | 28 (1.7%)       |
| Stopped therapy autonomously at visit 1 |                                              |  |                                            |  |                 |
| n                                       | 192                                          |  | 58                                         |  | 250             |
| NO                                      | 100 (52.1%)                                  |  | 58 (100.0%)                                |  | 158 (63.2%)     |
| YES                                     | 92 (47.9%)                                   |  | 0                                          |  | 92 (36.8%)      |
| Stopped therapy autonomously at visit 2 |                                              |  |                                            |  |                 |
| n                                       | 50                                           |  | 115                                        |  | 165             |
| NO                                      | 36 (72.0%)                                   |  | 115 (100.0%)                               |  | 151 (91.5%)     |
| YES                                     | 14 (28.0%)                                   |  | 0                                          |  | 14 (8.5%)       |
| Stopped therapy autonomously at visit 3 |                                              |  |                                            |  |                 |
| n                                       | 48                                           |  | 146                                        |  | 194             |
| NO                                      | 40 (83.3%)                                   |  | 146 (100.0%)                               |  | 186 (95.9%)     |
| YES                                     | 8 (16.7%)                                    |  | 0                                          |  | 8 (4.1%)        |

|                                                    | Patients discontinuing<br>treatment<br>N=251 |  | Patients continuing<br>treatment<br>N=1580 |  | TOTAL<br>N=1831 |
|----------------------------------------------------|----------------------------------------------|--|--------------------------------------------|--|-----------------|
| Stopped therapy by general practitioner at visit 1 |                                              |  |                                            |  |                 |
| n                                                  | 184                                          |  | 58                                         |  | 242             |
| NO                                                 | 172 (93.5%)                                  |  | 58 (100.0%)                                |  | 230 (95.0%)     |
| YES                                                | 12 (6.5%)                                    |  | 0                                          |  | 12 (5.0%)       |
| Stopped therapy by general practitioner at visit 2 |                                              |  |                                            |  |                 |
| n                                                  | 50                                           |  | 114                                        |  | 164             |
| NO                                                 | 47 (94.0%)                                   |  | 114 (100.0%)                               |  | 161 (98.2%)     |
| YES                                                | 3 (6.0%)                                     |  | 0                                          |  | 3 (1.8%)        |

|                                                    |             |  |              |             |
|----------------------------------------------------|-------------|--|--------------|-------------|
| Stopped therapy by general practitioner at visit 3 |             |  |              |             |
| n                                                  | 48          |  | 117          | 165         |
| NO                                                 | 47 (97.9%)  |  | 117 (100.0%) | 164 (99.4%) |
| YES                                                | 1 (2.1%)    |  | 0            | 1 (0.6%)    |
| Stopped therapy by dermatologist at visit 1        |             |  |              |             |
| n                                                  | 183         |  | 30           | 213         |
| NO                                                 | 142 (77.6%) |  | 30 (100.0%)  | 172 (80.8%) |
| YES                                                | 41 (22.4%)  |  | 0            | 41 (19.2%)  |

|                                             | Patients discontinuing<br>treatment<br>N=251 | Patients continuing<br>treatment<br>N=1580 | TOTAL<br>N=1831 |
|---------------------------------------------|----------------------------------------------|--------------------------------------------|-----------------|
| Stopped therapy by dermatologist at visit 2 |                                              |                                            |                 |
| n                                           | 51                                           | 114                                        | 165             |
| NO                                          | 29 (56.9%)                                   | 114 (100.0%)                               | 143 (86.7%)     |
| YES                                         | 22 (43.1%)                                   | 0                                          | 22 (13.3%)      |
| Stopped therapy by dermatologist at visit 3 |                                              |                                            |                 |
| n                                           | 48                                           | 116                                        | 164             |
| NO                                          | 25 (52.1%)                                   | 116 (100.0%)                               | 141 (86.0%)     |
| YES                                         | 23 (47.9%)                                   | 0                                          | 23 (14.0%)      |
| Reason stopped therapy at visit 1           |                                              |                                            |                 |
| n                                           | 192                                          | 4                                          | 196             |
| Other cause                                 | 101 (52.6%)                                  | 0                                          | 101 (51.5%)     |
| Comorbidity                                 | 10 (5.2%)                                    | 0                                          | 10 (5.1%)       |
| Contact with SARS-CoV-2+ subject            | 7 (3.6%)                                     | 0                                          | 7 (3.6%)        |
| Age >60                                     | 6 (3.1%)                                     | 4 (100.0%)                                 | 10 (5.1%)       |
| SARS-CoV-2 infection                        | 6 (3.1%)                                     | 0                                          | 6 (3.1%)        |
| Fear of SARS-CoV-2 infection                | 62 (32.3%)                                   | 0                                          | 62 (31.6%)      |

|                                   | Patients discontinuing<br>treatment<br>N=251 | Patients continuing<br>treatment<br>N=1580 | TOTAL<br>N=1831 |
|-----------------------------------|----------------------------------------------|--------------------------------------------|-----------------|
| Reason stopped therapy at visit 2 |                                              |                                            |                 |

|                                   |            |      |            |
|-----------------------------------|------------|------|------------|
| n                                 | 49         | 0    | 49         |
| Other cause                       | 32 (65.3%) | 0    | 32 (65.3%) |
| Comorbidity                       | 5 (10.2%)  | 0    | 5 (10.2%)  |
| Age >60                           | 3 (6.1%)   | 0    | 3 (6.1%)   |
| SARS-CoV-2 infection              | 3 (6.1%)   | 0    | 3 (6.1%)   |
| Fear of SARS-CoV-2 infection      | 6 (12.2%)  | 0    | 6 (12.2%)  |
| Reason stopped therapy at visit 3 |            |      |            |
| n                                 | 48         | 0    | 48         |
| Other cause                       | 35 (72.9%) | 0    | 35 (72.9%) |
| Comorbidity                       | 2 (4.2%)   | 0    | 2 (4.2%)   |
| Age >60                           | 6 (12.5%)  | 0    | 6 (12.5%)  |
| SARS-CoV-2 infection              | 2 (4.2%)   | 0    | 2 (4.2%)   |
| Fear of SARS-CoV-2 infection      | 3 (6.3%)   | 0    | 3 (6.3%)   |
| COVID-19 infection at visit 1     |            |      |            |
| n                                 | 247        | 1469 | 1716       |

|                               | Patients discontinuing treatment<br>N=251 | Patients continuing treatment<br>N=1580 | TOTAL<br>N=1831 |
|-------------------------------|-------------------------------------------|-----------------------------------------|-----------------|
| COVID-19 infection at visit 1 |                                           |                                         |                 |
| NO                            | 241 (97.6%)                               | 1462 (99.5%)                            | 1703 (99.2%)    |
| YES                           | 6 (2.4%)                                  | 7 (0.5%)                                | 13 (0.8%)       |
| COVID-19 infection at visit 2 |                                           |                                         |                 |
| n                             | 240                                       | 1536                                    | 1776            |
| NO                            | 236 (98.3%)                               | 1535 (99.9%)                            | 1771 (99.7%)    |
| YES                           | 4 (1.7%)                                  | 1 (0.1%)                                | 5 (0.3%)        |
| COVID-19 infection at visit 3 |                                           |                                         |                 |
| n                             | 225                                       | 1469                                    | 1694            |
| NO                            | 223 (99.1%)                               | 1469 (100.0%)                           | 1692 (99.9%)    |
| YES                           | 2 (0.9%)                                  | 0                                       | 2 (0.1%)        |
| Buffer performed at visit 1   |                                           |                                         |                 |
| n                             | 247                                       | 1469                                    | 1716            |
| NO                            | 228 (92.3%)                               | 1446 (98.4%)                            | 1674 (97.6%)    |
| YES                           | 19 (7.7%)                                 | 23 (1.6%)                               | 42 (2.4%)       |

|                             | Patients discontinuing<br>treatment<br>N=251 | Patients continuing<br>treatment<br>N=1580 | TOTAL<br>N=1831 |
|-----------------------------|----------------------------------------------|--------------------------------------------|-----------------|
| Buffer performed at visit 2 |                                              |                                            |                 |
| n                           | 240                                          | 1535                                       | 1775            |
| NO                          | 230 (95.8%)                                  | 1525 (99.3%)                               | 1755 (98.9%)    |
| YES                         | 10 (4.2%)                                    | 10 (0.7%)                                  | 20 (1.1%)       |
| Buffer performed at visit 3 |                                              |                                            |                 |
| n                           | 225                                          | 1469                                       | 1694            |
| NO                          | 220 (97.8%)                                  | 1457 (99.2%)                               | 1677 (99.0%)    |
| YES                         | 5 (2.2%)                                     | 12 (0.8%)                                  | 17 (1.0%)       |
| Hospitalisation at visit 1  |                                              |                                            |                 |
| n                           | 246                                          | 1449                                       | 1695            |
| NO                          | 244 (99.2%)                                  | 1448 (99.9%)                               | 1692 (99.8%)    |
| YES                         | 2 (0.8%)                                     | 1 (0.1%)                                   | 3 (0.2%)        |
| Hospitalisation at visit 2  |                                              |                                            |                 |
| n                           | 240                                          | 1536                                       | 1776            |
| NO                          | 240 (100.0%)                                 | 1536 (100.0%)                              | 1776 (100.0%)   |

|                                                            | Patients discontinuing<br>treatment<br>N=251 | Patients continuing<br>treatment<br>N=1580 | TOTAL<br>N=1831 |
|------------------------------------------------------------|----------------------------------------------|--------------------------------------------|-----------------|
| Hospitalisation at visit 3                                 |                                              |                                            |                 |
| n                                                          | 225                                          | 1469                                       | 1694            |
| NO                                                         | 225 (100.0%)                                 | 1469 (100.0%)                              | 1694 (100.0%)   |
| Dosage changed or lengthening of time intervals at visit 1 |                                              |                                            |                 |
| n                                                          | 231                                          | 1479                                       | 1710            |
| NO                                                         | 214 (92.6%)                                  | 1463 (98.9%)                               | 1677 (98.1%)    |
| YES                                                        | 17 (7.4%)                                    | 16 (1.1%)                                  | 33 (1.9%)       |
| Dosage changed or lengthening of time intervals at visit 2 |                                              |                                            |                 |
| n                                                          | 146                                          | 1096                                       | 1242            |
| NO                                                         | 136 (93.2%)                                  | 1086 (99.1%)                               | 1222 (98.4%)    |
| YES                                                        | 10 (6.8%)                                    | 10 (0.9%)                                  | 20 (1.6%)       |
| Dosage changed or lengthening of time intervals at visit 3 |                                              |                                            |                 |
| n                                                          | 148                                          | 906                                        | 1054            |
| NO                                                         | 139 (93.9%)                                  | 902 (99.6%)                                | 1041 (98.8%)    |
| YES                                                        | 9 (6.1%)                                     | 4 (0.4%)                                   | 13 (1.2%)       |

|                             | Patients discontinuing<br>treatment<br>N=251 | Patients continuing<br>treatment<br>N=1580 | TOTAL<br>N=1831 |
|-----------------------------|----------------------------------------------|--------------------------------------------|-----------------|
| Modified therapy at visit 2 |                                              |                                            |                 |
| n                           | 240                                          | 1535                                       | 1775            |
| NO                          | 161 (67.1%)                                  | 1449 (94.4%)                               | 1610 (90.7%)    |
| YES                         | 79 (32.9%)                                   | 86 (5.6%)                                  | 165 (9.3%)      |
| Modified therapy at visit 3 |                                              |                                            |                 |
| n                           | 224                                          | 1437                                       | 1661            |
| NO                          | 160 (71.4%)                                  | 1393 (96.9%)                               | 1553 (93.5%)    |
| YES                         | 64 (28.6%)                                   | 44 (3.1%)                                  | 108 (6.5%)      |
| Other therapy at visit 1    |                                              |                                            |                 |
| n                           | 250                                          | 1399                                       | 1649            |
| NO                          | 71 (28.4%)                                   | 446 (31.9%)                                | 517 (31.4%)     |
| Topical therapy             | 109 (43.6%)                                  | 275 (19.7%)                                | 384 (23.3%)     |
| Homeopathy                  | 0                                            | 3 (0.2%)                                   | 3 (0.2%)        |
| Emollients                  | 70 (28.0%)                                   | 675 (48.2%)                                | 745 (45.2%)     |
| Other therapy at visit 2    |                                              |                                            |                 |
| n                           | 183                                          | 1227                                       | 1410            |

|                                     | Patients discontinuing<br>treatment<br>N=251 | Patients continuing<br>treatment<br>N=1580 | TOTAL<br>N=1831 |
|-------------------------------------|----------------------------------------------|--------------------------------------------|-----------------|
| Other therapy at visit 2            |                                              |                                            |                 |
| NO                                  | 38 (20.8%)                                   | 261 (21.3%)                                | 299 (21.2%)     |
| Topical therapy                     | 52 (28.4%)                                   | 212 (17.3%)                                | 264 (18.7%)     |
| Homeopathy                          | 1 (0.5%)                                     | 2 (0.2%)                                   | 3 (0.2%)        |
| Emollients                          | 91 (49.7%)                                   | 748 (61.0%)                                | 839 (59.5%)     |
| Other therapy at visit 3            |                                              |                                            |                 |
| n                                   | 180                                          | 1232                                       | 1412            |
| NO                                  | 43 (23.9%)                                   | 341 (27.7%)                                | 384 (27.2%)     |
| Topical therapy                     | 53 (29.4%)                                   | 217 (17.6%)                                | 270 (19.1%)     |
| Homeopathy                          | 1 (0.6%)                                     | 3 (0.2%)                                   | 4 (0.3%)        |
| Emollients                          | 82 (45.6%)                                   | 668 (54.2%)                                | 750 (53.1%)     |
| Therapies followed during the study |                                              |                                            |                 |
| n                                   | 251                                          | 1580                                       | 1831            |
| Anti-histamines                     | 2 (0.8%)                                     | 36 (2.3%)                                  | 38 (2.1%)       |

|                                                                             | Patients discontinuing<br>treatment<br>N=251 | Patients continuing<br>treatment<br>N=1580 | TOTAL<br>N=1831 |
|-----------------------------------------------------------------------------|----------------------------------------------|--------------------------------------------|-----------------|
| Therapies followed during the study                                         |                                              |                                            |                 |
| Anti-histamines                                                             | 0                                            | 3 (0.2%)                                   | 3 (0.2%)        |
| Azathioprine                                                                |                                              |                                            |                 |
| Anti-histamines<br>Cyclosporine                                             | 16 (6.4%)                                    | 35 (2.2%)                                  | 51 (2.8%)       |
| Anti-histamines<br>Cyclosporine Systemic<br>corticosteroids                 | 3 (1.2%)                                     | 2 (0.1%)                                   | 5 (0.3%)        |
| Anti-histamines<br>Cyclosporine Systemic<br>cortico. Dupilumab              | 1 (0.4%)                                     | 1 (0.1%)                                   | 2 (0.1%)        |
| Anti-histamines<br>Cyclosporine Systemic<br>corticosteroids<br>phototherapy | 1 (0.4%)                                     | 0                                          | 1 (0.1%)        |
| Anti-histamines<br>Cyclosporine Dupilumab                                   | 4 (1.6%)                                     | 11 (0.7%)                                  | 15 (0.8%)       |
| Anti-histamines<br>Cyclosporine<br>Methotrexate Dupilumab                   | 0                                            | 1 (0.1%)                                   | 1 (0.1%)        |
| Anti-histamines<br>Systemic<br>corticosteroids                              | 9 (3.6%)                                     | 9 (0.6%)                                   | 18 (1.0%)       |
| Anti-histamines<br>Systemic corticoster.<br>Dupilumab                       | 6 (2.4%)                                     | 34 (2.2%)                                  | 40 (2.2%)       |
| Anti-histamines<br>Dupilumab                                                | 32 (12.7%)                                   | 322 (20.4%)                                | 354 (19.3%)     |
| Anti-histamines<br>Phototherapy                                             | 15 (6.0%)                                    | 3 (0.2%)                                   | 18 (1.0%)       |
| Anti-histamines<br>Phototherapy Dupilumab                                   | 6 (2.4%)                                     | 3 (0.2%)                                   | 9 (0.5%)        |
| Anti-histamines<br>Methotrexate                                             | 0                                            | 3 (0.2%)                                   | 3 (0.2%)        |
| Anti-histamines<br>Methotrexate Systemic<br>corticosteroids                 | 1 (0.4%)                                     | 1 (0.1%)                                   | 2 (0.1%)        |
| Anti-histamines<br>Methotrexate Systemic<br>corticosteroids<br>Dupilumab    | 0                                            | 1 (0.1%)                                   | 1 (0.1%)        |



|                                                                 | Patients discontinuing<br>treatment<br>N=251 | Patients continuing<br>treatment<br>N=1580 | TOTAL<br>N=1831 |
|-----------------------------------------------------------------|----------------------------------------------|--------------------------------------------|-----------------|
| Therapies followed during the study                             |                                              |                                            |                 |
| Anti-histamines<br>Methotrexate Dupilumab                       | 0                                            | 6 (0.4%)                                   | 6 (0.3%)        |
| Anti-histamines<br>Mycophen. mofetil<br>Systemic cortic. Dupi.  | 0                                            | 1 (0.1%)                                   | 1 (0.1%)        |
| Azathioprine                                                    | 0                                            | 5 (0.3%)                                   | 5 (0.3%)        |
| Cyclosporine                                                    | 10 (4.0%)                                    | 37 (2.3%)                                  | 47 (2.6%)       |
| Cyclosporine<br>Systemic corticoster.<br>Dupilumab              | 1 (0.4%)                                     | 3 (0.2%)                                   | 4 (0.2%)        |
| Cyclosporine<br>Systemic corticoster.<br>Phototherapy           | 1 (0.4%)                                     | 0                                          | 1 (0.1%)        |
| Cyclosporine<br>Systemic corticoster.<br>Phototherapy Dupilumab | 0                                            | 1 (0.1%)                                   | 1 (0.1%)        |
| Cyclosporine<br>Dupilumab                                       | 12 (4.8%)                                    | 34 (2.2%)                                  | 46 (2.5%)       |
| Cyclosporine<br>Phototherapy                                    | 1 (0.4%)                                     | 0                                          | 1 (0.1%)        |
| Cyclosporine<br>Phototherapy Dupilumab                          | 0                                            | 1 (0.1%)                                   | 1 (0.1%)        |
| Cyclosporine<br>Methotrexate                                    | 2 (0.8%)                                     | 2 (0.1%)                                   | 4 (0.2%)        |
| Cyclosporine<br>Methotrexate Dupilumab                          | 0                                            | 1 (0.1%)                                   | 1 (0.1%)        |
| Systemic<br>corticoster.                                        | 4 (1.6%)                                     | 3 (0.2%)                                   | 7 (0.4%)        |
| Systemic corticoster.<br>Dupilumab                              | 6 (2.4%)                                     | 46 (2.9%)                                  | 52 (2.8%)       |
| Systemic corticoster.<br>Phototherapy                           | 0                                            | 3 (0.2%)                                   | 3 (0.2%)        |

|                                                       | Patients discontinuing<br>treatment<br>N=251 | Patients continuing<br>treatment<br>N=1580 | TOTAL<br>N=1831 |
|-------------------------------------------------------|----------------------------------------------|--------------------------------------------|-----------------|
| Therapies followed during the study                   |                                              |                                            |                 |
| Systemic<br>corticoster. Photother<br>Dupilumab       | 1 (0.4%)                                     | 1 (0.1%)                                   | 2 (0.1%)        |
| Dupilumab                                             | 75 (29.9%)                                   | 938 (59.4%)                                | 1013 (55.3%)    |
| Phototherapy                                          | 28 (11.2%)                                   | 2 (0.1%)                                   | 30 (1.6%)       |
| Photother Dupilumab                                   | 6 (2.4%)                                     | 6 (0.4%)                                   | 12 (0.7%)       |
| Methotrexate                                          | 1 (0.4%)                                     | 16 (1.0%)                                  | 17 (0.9%)       |
| Methotrexate<br>Systemic<br>corticoster.<br>Dupilumab | 0                                            | 4 (0.3%)                                   | 4 (0.2%)        |

|                                             |             |              |              |
|---------------------------------------------|-------------|--------------|--------------|
| Dupilumab Methotrexate                      | 6 (2.4%)    | 3 (0.2%)     | 9 (0.5%)     |
| Methotrexate<br>Phototherapy                | 1 (0.4%)    | 0            | 1 (0.1%)     |
| Methotrexate<br>Phototherapy Dupilumab      | 0           | 1 (0.1%)     | 1 (0.1%)     |
| Mycophen. mofetil<br>Systemic cortic. Dupi. | 0           | 1 (0.1%)     | 1 (0.1%)     |
| Quarantene at vist 1                        |             |              |              |
| n                                           | 247         | 1469         | 1716         |
| NO                                          | 222 (89.9%) | 1446 (98.4%) | 1668 (97.2%) |
| YES                                         | 25 (10.1%)  | 23 (1.6%)    | 48 (2.8%)    |

|                             | Patients discontinuing<br>treatment<br>N=251 | Patients continuing<br>treatment<br>N=1580 | TOTAL<br>N=1831 |
|-----------------------------|----------------------------------------------|--------------------------------------------|-----------------|
| Quarantene at vist 2        |                                              |                                            |                 |
| n                           | 240                                          | 1536                                       | 1776            |
| NO                          | 235 (97.9%)                                  | 1533 (99.8%)                               | 1768 (99.5%)    |
| YES                         | 5 (2.1%)                                     | 3 (0.2%)                                   | 8 (0.5%)        |
| Quarantene at vist 3        |                                              |                                            |                 |
| n                           | 225                                          | 1469                                       | 1694            |
| NO                          | 224 (99.6%)                                  | 1468 (99.9%)                               | 1692 (99.9%)    |
| YES                         | 1 (0.4%)                                     | 1 (0.1%)                                   | 2 (0.1%)        |
| Therapy restarted at vist 1 |                                              |                                            |                 |
| n                           | 182                                          | 1                                          | 183             |
| NO                          | 163 (89.6%)                                  | 1 (100.0%)                                 | 164 (89.6%)     |
| YES                         | 19 (10.4%)                                   | 0                                          | 19 (10.4%)      |
| Therapy restarted at vist 2 |                                              |                                            |                 |
| n                           | 158                                          | 3                                          | 161             |
| NO                          | 96 (60.8%)                                   | 1 (33.3%)                                  | 97 (60.2%)      |
| YES                         | 62 (39.2%)                                   | 2 (66.7%)                                  | 64 (39.8%)      |

| Patients discontinuing<br>treatment | Patients continuing<br>treatment | TOTAL |
|-------------------------------------|----------------------------------|-------|
|-------------------------------------|----------------------------------|-------|

|                             | N=251       | N=1580      | N=1831       |
|-----------------------------|-------------|-------------|--------------|
| Therapy restarted at vist 3 |             |             |              |
| n                           | 70          | 3           | 73           |
| NO                          | 43 (61.4%)  | 3 (100.0%)  | 46 (63.0%)   |
| YES                         | 27 (38.6%)  | 0           | 27 (37.0%)   |
| AD status at vist 1         |             |             |              |
| n                           | 251         | 1577        | 1828         |
| improved                    | 39 (15.5%)  | 454 (28.8%) | 493 (27.0%)  |
| worsened                    | 90 (35.9%)  | 162 (10.3%) | 252 (13.8%)  |
| stable                      | 122 (48.6%) | 961 (60.9%) | 1083 (59.2%) |
| AD status at vist 2         |             |             |              |
| n                           | 240         | 1535        | 1775         |
| improved                    | 53 (22.1%)  | 417 (27.2%) | 470 (26.5%)  |
| worsened                    | 85 (35.4%)  | 138 (9.0%)  | 223 (12.6%)  |
| stable                      | 102 (42.5%) | 980 (63.8%) | 1082 (61.0%) |
| AD status at vist 3         |             |             |              |
| n                           | 225         | 1464        | 1689         |

|                     | Patients discontinuing<br>treatment<br>N=251 | Patients continuing<br>treatment<br>N=1580 | TOTAL<br>N=1831 |
|---------------------|----------------------------------------------|--------------------------------------------|-----------------|
| AD status at vist 3 |                                              |                                            |                 |
| 0.8                 | 0                                            | 1 (0.1%)                                   | 1 (0.1%)        |
| improved            | 69 (30.7%)                                   | 442 (30.2%)                                | 511 (30.3%)     |
| worsened            | 43 (19.1%)                                   | 101 (6.9%)                                 | 144 (8.5%)      |
| stable              | 113 (50.2%)                                  | 920 (62.8%)                                | 1033 (61.2%)    |
| Age (years)         |                                              |                                            |                 |
| n                   | 251                                          | 1580                                       | 1831            |
| Mean (SD)           | 41.5 (18.2)                                  | 42.3 (17.2)                                | 42.2 (17.4)     |
| Median              | 36.0                                         | 41.0                                       | 40.0            |
| Range               | 17 ; 89                                      | 15 ; 92                                    | 15 ; 92         |
| EASI at visit 1     |                                              |                                            |                 |
| n                   | 251                                          | 1580                                       | 1831            |
| Mean (SD)           | 8.231 (7.457)                                | 6.628 (7.773)                              | 6.847 (7.748)   |
| Median              | 5.600                                        | 4.000                                      | 4.000           |
| Range               | 0.00 ; 32.00                                 | 0.00 ; 47.00                               | 0.00 ; 47.00    |

|                                        | Patients discontinuing<br>treatment<br>N=251 |  | Patients continuing<br>treatment<br>N=1580 |  | TOTAL<br>N=1831 |  |
|----------------------------------------|----------------------------------------------|--|--------------------------------------------|--|-----------------|--|
| EASI at visit 3                        |                                              |  |                                            |  |                 |  |
| n                                      | 91                                           |  | 655                                        |  | 746             |  |
| Mean (SD)                              | 7.28 (7.68)                                  |  | 2.83 (3.43)                                |  | 3.37 (4.42)     |  |
| Median                                 | 4.00                                         |  | 2.00                                       |  | 2.00            |  |
| Range                                  | 0.0 ; 33.0                                   |  | 0.0 ; 31.0                                 |  | 0.0 ; 33.0      |  |
| Change in EASI from visit 1 to visit 3 |                                              |  |                                            |  |                 |  |
| n                                      | 91                                           |  | 655                                        |  | 746             |  |
| Mean (SD)                              | -0.230 (7.665)                               |  | -2.823 (7.103)                             |  | -2.507 (7.219)  |  |
| Median                                 | -0.600                                       |  | -1.000                                     |  | -1.000          |  |
| Range                                  | -26.00 ; 22.00                               |  | -47.00 ; 26.00                             |  | -47.00 ; 26.00  |  |
| P-value (for pre-post) Paired t-test   |                                              |  |                                            |  | <0.0001         |  |
| VAS - pruritus at visit 1              |                                              |  |                                            |  |                 |  |
| n                                      | 251                                          |  | 1577                                       |  | 1828            |  |
| Mean (SD)                              | 3.7 (2.3)                                    |  | 2.4 (2.1)                                  |  | 2.6 (2.2)       |  |
| Median                                 | 4.0                                          |  | 2.0                                        |  | 2.0             |  |
| Range                                  | 0 ; 9                                        |  | 0 ; 10                                     |  | 0 ; 10          |  |

|                                                  | Patients discontinuing<br>treatment<br>N=251 |  | Patients continuing<br>treatment<br>N=1580 |  | TOTAL<br>N=1831 |  |
|--------------------------------------------------|----------------------------------------------|--|--------------------------------------------|--|-----------------|--|
| VAS - pruritus at visit 2                        |                                              |  |                                            |  |                 |  |
| n                                                | 240                                          |  | 1535                                       |  | 1775            |  |
| Mean (SD)                                        | 3.8 (2.7)                                    |  | 2.2 (2.1)                                  |  | 2.5 (2.3)       |  |
| Median                                           | 4.0                                          |  | 2.0                                        |  | 2.0             |  |
| Range                                            | 0 ; 10                                       |  | 0 ; 10                                     |  | 0 ; 10          |  |
| VAS - pruritus at visit 3                        |                                              |  |                                            |  |                 |  |
| n                                                | 225                                          |  | 1465                                       |  | 1690            |  |
| Mean (SD)                                        | 3.3 (2.6)                                    |  | 2.0 (2.0)                                  |  | 2.2 (2.1)       |  |
| Median                                           | 3.0                                          |  | 2.0                                        |  | 2.0             |  |
| Range                                            | 0 ; 10                                       |  | 0 ; 10                                     |  | 0 ; 10          |  |
| Change in VAS - pruritus from visit 1 to visit 3 |                                              |  |                                            |  |                 |  |
| n                                                | 225                                          |  | 1462                                       |  | 1687            |  |
| Mean (SD)                                        | -0.2 (2.7)                                   |  | -0.3 (2.0)                                 |  | -0.3 (2.1)      |  |
| Median                                           | 0.0                                          |  | 0.0                                        |  | 0.0             |  |
| Range                                            | -7 ; 10                                      |  | -9 ; 8                                     |  | -9 ; 10         |  |
| P-value (for pre-post) Paired t-test             |                                              |  |                                            |  | <0.0001         |  |

|                        | Patients discontinuing<br>treatment<br>N=251 |       | Patients continuing<br>treatment<br>N=1580 |       | TOTAL<br>N=1831 |       |
|------------------------|----------------------------------------------|-------|--------------------------------------------|-------|-----------------|-------|
| VAS - sleep at visit 1 |                                              |       |                                            |       |                 |       |
| n                      | 251                                          |       | 1577                                       |       | 1828            |       |
| Mean (SD)              | 2.7                                          | (2.4) | 1.6                                        | (2.0) | 1.7             | (2.1) |
| Median                 | 2.0                                          |       | 1.0                                        |       | 1.0             |       |
| Range                  | 0                                            | ; 9   | 0                                          | ; 10  | 0               | ; 10  |
| VAS - sleep at visit 2 |                                              |       |                                            |       |                 |       |
| n                      | 240                                          |       | 1535                                       |       | 1775            |       |
| Mean (SD)              | 2.8                                          | (2.8) | 1.5                                        | (1.8) | 1.6             | (2.0) |
| Median                 | 2.0                                          |       | 1.0                                        |       | 1.0             |       |
| Range                  | 0                                            | ; 10  | 0                                          | ; 10  | 0               | ; 10  |
| VAS - sleep at visit 3 |                                              |       |                                            |       |                 |       |
| n                      | 225                                          |       | 1465                                       |       | 1690            |       |
| Mean (SD)              | 2.2                                          | (2.4) | 1.2                                        | (1.7) | 1.3             | (1.9) |
| Median                 | 1.0                                          |       | 0.0                                        |       | 1.0             |       |
| Range                  | 0                                            | ; 9   | 0                                          | ; 9   | 0               | ; 9   |

|                                               | Patients discontinuing<br>treatment<br>N=251 |       | Patients continuing<br>treatment<br>N=1580 |       | TOTAL<br>N=1831 |       |
|-----------------------------------------------|----------------------------------------------|-------|--------------------------------------------|-------|-----------------|-------|
| Change in VAS - sleep from visit 1 to visit 3 |                                              |       |                                            |       |                 |       |
| n                                             | 225                                          |       | 1462                                       |       | 1687            |       |
| Mean (SD)                                     | -0.3                                         | (2.8) | -0.3                                       | (1.9) | -0.3            | (2.0) |
| Median                                        | 0.0                                          |       | 0.0                                        |       | 0.0             |       |
| Range                                         | -8                                           | ; 8   | -10                                        | ; 9   | -10             | ; 9   |
| P-value (for pre-post) Paired t-test          |                                              |       |                                            |       | <0.0001         |       |
| VAS - skin damage at visit 1                  |                                              |       |                                            |       |                 |       |
| n                                             | 251                                          |       | 1577                                       |       | 1828            |       |
| Mean (SD)                                     | 3.5                                          | (2.2) | 2.3                                        | (2.0) | 2.5             | (2.1) |
| Median                                        | 4.0                                          |       | 2.0                                        |       | 2.0             |       |
| Range                                         | 0                                            | ; 9   | 0                                          | ; 10  | 0               | ; 10  |
| VAS - skin damage at visit 2                  |                                              |       |                                            |       |                 |       |
| n                                             | 240                                          |       | 1535                                       |       | 1775            |       |
| Mean (SD)                                     | 3.7                                          | (2.6) | 2.1                                        | (1.9) | 2.3             | (2.1) |
| Median                                        | 3.0                                          |       | 2.0                                        |       | 2.0             |       |
| Range                                         | 0                                            | ; 10  | 0                                          | ; 10  | 0               | ; 10  |

|                                               | Patients discontinuing<br>treatment<br>N=251 |        | Patients continuing<br>treatment<br>N=1580 |       | TOTAL<br>N=1831 |        |
|-----------------------------------------------|----------------------------------------------|--------|--------------------------------------------|-------|-----------------|--------|
| VAS - skin damage at visit 3                  |                                              |        |                                            |       |                 |        |
| n                                             | 225                                          |        | 1464                                       |       | 1689            |        |
| Mean (SD)                                     | 3.0                                          | (2.4)  | 1.9                                        | (1.9) | 2.1             | (2.0)  |
| Median                                        | 2.0                                          |        | 2.0                                        |       | 2.0             |        |
| Range                                         | 0                                            | ; 9    | 0                                          | ; 9   | 0               | ; 9    |
| Duration of total therapy interruption (days) |                                              |        |                                            |       |                 |        |
| n                                             | 98                                           |        | 0                                          |       | 98              |        |
| Mean (SD)                                     | 56.5                                         | (27.2) |                                            |       | 56.5            | (27.2) |
| Median                                        | 56.0                                         |        |                                            |       | 56.0            |        |
| Range                                         | 0                                            | ; 125  |                                            |       | 0               | ; 125  |
